# Supplementary material
Source: PubMed Central journal article supplement (PMC3328516)
Supplement: supp_110523_cervical-demers-1-at.pdf [file supp_110523_cervical-demers-1-at.pdf]

**Appendix 1 (as supplied by authors): Participation rates in cervical cancer screening for Aboriginal and non-Aboriginal women in Canada**

| Source*                 | year     | Population / locality* | At least one Pap test in: | Participation rates (%) |                   |
|-------------------------|----------|------------------------|---------------------------|-------------------------|-------------------|
|                         |          |                        |                           | Aboriginal              | Non-Aboriginal    |
| Hislop et al(2)         | 1990-92  | FN / BC                | 3 years                   | 62                      | 84                |
| Young et al(1)          | 1993-95  | FN / Manitoba          | 3 years                   | 42.6                    | 60.4              |
| Statistic Canada(6)     | 2000, 03 | Aboriginal / Canada    | 3 years                   | 85.3                    | 86.5              |
| Statistic Canada(3)     | 2000, 04 | Inuit / Nunaat         | 3 years                   | 75.4                    | 80.1              |
| Statistics Canada(4,5)  | 2005     | Inuit / Nunavut        | 3 years                   | 79.3                    | 72.8 <sup>†</sup> |
| AFN(7)                  | 2002     | FN / Canada            | 3 years                   | 75-80                   | N/A               |
| Louchini et al(8)       | 2004     | Inuit / Nunavik        | 2 years                   | 77.1                    | N/A               |
| Hamlin-Douglas et al(9) | 2002-07  | Inuit / Nunavik        | 3 years                   | 71                      | N/A               |
| Martens et al(10)       | 2004-06  | Métis / MB             | 3 years                   | 69.0                    | 67.8              |
| NAHO(13)                | 2002     | FN / Canada            | 1 year                    | 50.0                    | N/A               |
| NWT Social Services(11) | 2000-01  | Canadian / NWT         | 3 years                   |                         | 79 <sup>‡</sup>   |
| McDermott(12)           | 1997-00  | Aboriginal / NWT       | 4 years                   | 72.8                    | 89.8              |

\* AFN: Assembly of First Nations; FN: First Nations; NAHO: National Aboriginal Health Organization; NWT: Northwest Territories; BC: British Columbia

<sup>†</sup> Canadian population including Aboriginal groups

<sup>‡</sup> Entire Northwest Territories population
